# Supplementary material
Source: PubMed Central journal article supplement (PMC3179680)
Supplement: supp_kfr188_toxsci-11-0441-File007.pdf [file supp_kfr188_toxsci-11-0441-File007.pdf]

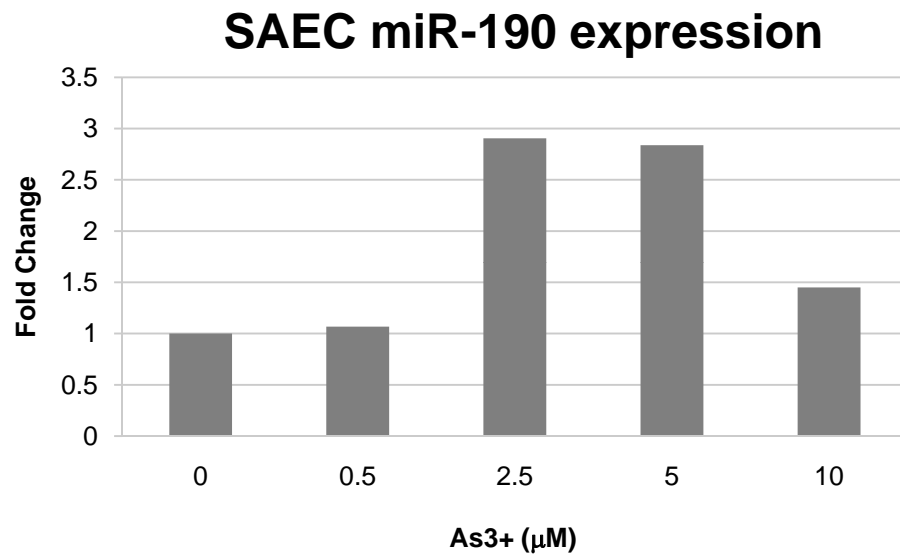

**Fig. S1:** As<sup>3+</sup> induces miR-190 expression in primary human SAEC cells.

Fig. S1

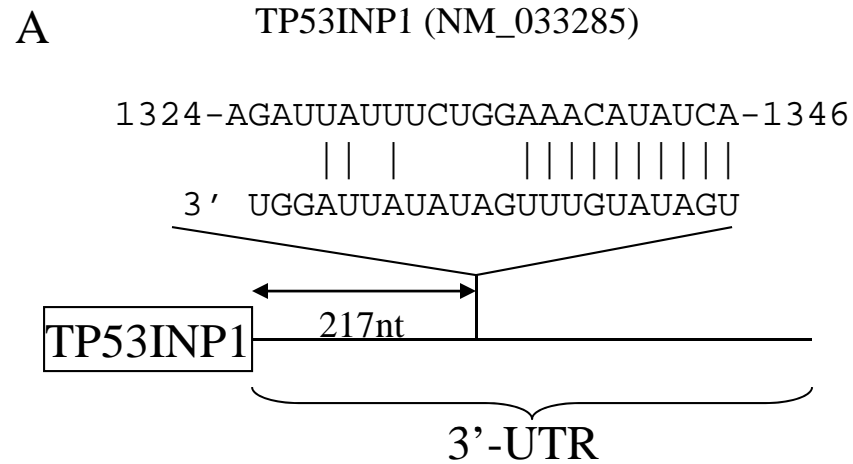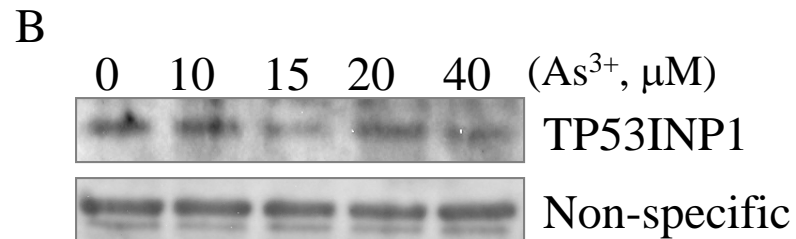

**Fig. S2:** miR-190 targets TP53INP1. **A.** Schematic diagram of miR-190 binding site at the 3'-UTR of TP53INP1 mRNA. **B.** Western blotting shows As<sup>3+</sup>-induced decrease of TP53INP1 protein.

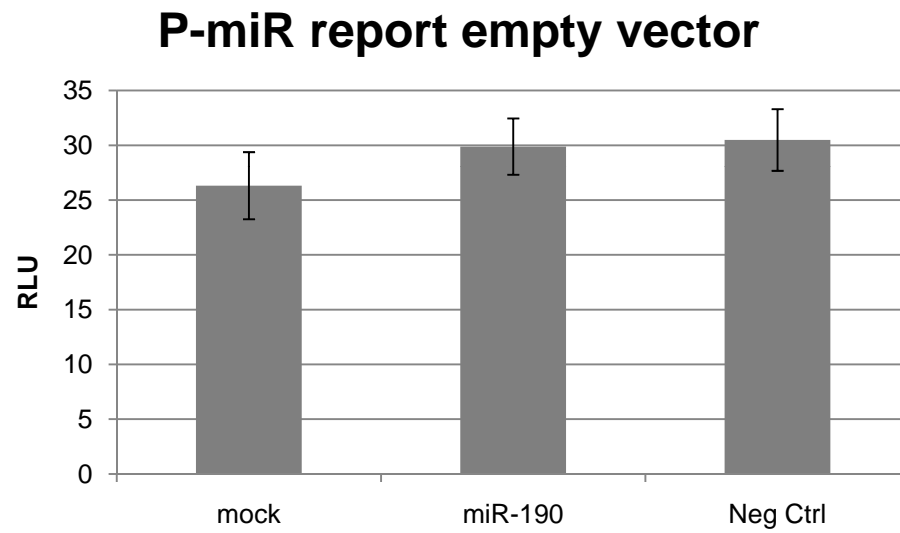

Fig. S3: miR-190 has no effect on the control pMIR-REPORT vector.

Fig. S3
